# Supplementary material for: Selenium and Selenoproteins in Adipose Tissue Physiology and Obesity
Source: MDPI journal article supplement (doi:10.3390/biom10040658), 2020-04-24
Supplement: s1 [file s1]

**Table S3.** A brief summary of studies demonstrating the association between selenoprotein P (SELENOP) levels and obesity

| Population                                   | Study design    | Year      | N (M/F)      | Sex        | Age                                            | Specimen | Se levels                                                                                                                                                                                                                                     | Statistics                                                                                                                                                                                                                                      | Adjustments factors                                                                                                                                                                                        | Ref. |
|----------------------------------------------|-----------------|-----------|--------------|------------|------------------------------------------------|----------|-----------------------------------------------------------------------------------------------------------------------------------------------------------------------------------------------------------------------------------------------|-------------------------------------------------------------------------------------------------------------------------------------------------------------------------------------------------------------------------------------------------|------------------------------------------------------------------------------------------------------------------------------------------------------------------------------------------------------------|------|
| Health survey evaluation in Germany          | Cross-sectional | 2005-2012 | 905          | Both (M/F) | 59.4 (57.8-61.1) (Q1) - 61.6 (59.9-63.2) (Q4)  | Blood    | Mean (95% CI) SELENOP ( $\mu\text{g/mL}$ )<br>2.86 (1.96-3.70) (Q1), 4.52 (3.87-5.98) (Q2), 6.05 (5.32-8.47) (Q3), 11.72 (8.07-15.79) (Q4)<br>BMI: 29.0 (28.3-29.6) (Q1), 27.4 (26.8-28.0) (Q2), 27.5 (26.9-28.1) (Q3), 25.7 (25.1-26.4) (Q4) | ORs (95%CI) for Q1-Q4<br>MS: 1.62 (1.08-2.43) (Q1), referent (Q2), 0.85 (0.57-1.26) (Q3), 0.41 (0.27-0.62) (Q4)<br>NAFLD: 1.32 (0.79-2.21), referent (Q2), 0.69 (0.41-1.16) (Q3), 0.90 (0.53-1.51) (Q4)<br>Obesity: OR: 0.73; 95% CI: 0.55-0.94 | Adjusted for age, sex, physical activity, education, smoking status, alcohol consumption, and C-reactive protein. NAFLD additionally adjusted for prevalent diabetes and BMI.                              | [76] |
| Selenegene study                             | Cross-sectional | 2015-2016 | 131 (99/32)  | Both (M/F) | 55.9 $\pm$ 7.52 (Non-MS), 55.6 $\pm$ 6.41 (MS) | Blood    | Mean $\pm$ SD SELENOP (ng/ml)<br>41.8 $\pm$ 6.57 (MS) vs 81.5 $\pm$ 15.2 (Non-MS), p=0.022                                                                                                                                                    | OR (95% CI)<br>MS: 0.995 (0.990-1.000)                                                                                                                                                                                                          | Adjusted for age, gender, family history and smoking                                                                                                                                                       | [76] |
| Health survey evaluation in Germany          | Cross-sectional | 2005-2015 | 553          | Both (M/F) | 60.6 (59.8-61.5)                               | Blood    | Median (IQR) SELENOP, $\mu\text{g/mL}$<br>4.86 (3.30-6.96) (MS) vs 6.15 (4.50-9.55) (Non-MS)                                                                                                                                                  | $\beta$ (95% CI)<br>MS: 0.54 (0.40-0.73)<br>DM2: 0.47 (0.28-0.78)<br>NAFLD: 0.93 (0.65-1.34)                                                                                                                                                    | Adjusted for age and sex, physical activity, educational level, smoking status, C-reactive protein, selenium supplementation, total energy intake (for NAFLD + for prevalent diabetes and body mass index) | [80] |
| Korean Metabolic Disorders and Obesity Study | Cross-sectional | 2006-2010 | 210 (113/97) | Both (M/F) | 9                                              | Blood    | Mean $\pm$ SD SELENOP (ng ml <sup>-1b</sup> )<br>16.7 $\pm$ 2.2 (MS) vs 28.6 $\pm$ 2.0 (Non-MS), p <0.001                                                                                                                                     | ORs (95%CI) for T1-T3<br>MS: 1.0, 0.47 (0.24-0.92), 0.18 (0.09-0.37), p<0.001                                                                                                                                                                   | Unadjusted                                                                                                                                                                                                 | [78] |

|                                               |                                                         |               |                |               |                                                    |       |                                                                                                                      |                                                                                                                                                           |                                                                                                                                                                                                                   |      |
|-----------------------------------------------|---------------------------------------------------------|---------------|----------------|---------------|----------------------------------------------------|-------|----------------------------------------------------------------------------------------------------------------------|-----------------------------------------------------------------------------------------------------------------------------------------------------------|-------------------------------------------------------------------------------------------------------------------------------------------------------------------------------------------------------------------|------|
|                                               |                                                         |               |                |               |                                                    |       | SELENOP (Tercile)<br>1.34–16.55 (T1),<br>16.74–32.03 (T2),<br>32.18–80.00 (T3)                                       | MS: 1.0, 0.25 (0.04–<br>1.60), 0.05 (0.00–0.96),<br>p=0.042                                                                                               | Adjusted for sex, physical<br>activity, sleep duration,<br>paternal education level,<br>high-sensitivity C-reactive<br>protein, HOMA-IR and<br>ALT                                                                |      |
| Health survey<br>evaluation in<br>South Korea | Follow-<br>up                                           | 2016          | 10<br>(4/6)    | Both<br>(M/F) | 25–46                                              | Blood | Mean ± SD<br>ln SELENOP, µg/mL<br>1.47 ± 0.11 (Before) vs<br>1.76 ± 0.10 (1m) vs<br>2.10 ± 0.08 (9m)                 | r=−0.770, p<0.05 (Δ<br>HOMA-IR)                                                                                                                           |                                                                                                                                                                                                                   | [79] |
| KSOS Study                                    | Prospect<br>ive<br>observat<br>ional<br>cohort<br>study | 2007-<br>2009 | 120<br>(59/61) | Both<br>(M/F) | 47.0±13.<br>0 (C),<br>49.1±13.<br>1<br>(NAFL<br>D) | Blood | Median (IQR)<br>SELENOP, ng/mL<br>530.4 (246.2–1478.2)<br>(Controls) vs 1509.3<br>(899.0–2773.2)<br>(NAFLD), p<0.001 | ORs (95%CI) for T1-T3<br>NAFLD: 1.00, 6.3 (1.51-<br>26.28), p=0.012, 7.48<br>(1.72–32.60), p=0.007                                                        | Adjusted for age, sex, BMI,<br>smoking status, SBP, DBP,<br>triglycerides, HDL-C, high<br>sensitivity C-reactive<br>protein, adiponectin, and<br>homeostasis model<br>assessment of insulin<br>resistance values. | [81] |
| Health survey<br>evaluation in<br>Australia   | Case-<br>control<br>Controls<br>n=29,<br>Ob n=34        | 2011-<br>2015 | 63<br>(19/44)  | Both<br>(M/F) | 23.2±15.<br>5                                      | Blood | Mean ± SD<br>SELENOP, µg/mL<br>14.5 ±12.8 (Controls)<br>vs 52.3 ±39.1 (Ob),<br>p=0.001                               | BMI: r = 0.55, P< 0.0001<br>HOMA-IR: r = 0.37, p=<br>0.005<br>TC: r = 0.46, p= 0.001<br>LDL cholesterol: r =<br>0.35, p= 0.02)<br>TAG: r = 0.48, p= 0.001 | Adjusted for sex and age                                                                                                                                                                                          | [82] |
|                                               |                                                         |               |                |               |                                                    |       | SELENOP1 mRNA<br>expression<br>1.1 ±0.2 (Controls)<br>vs 1.0 ±0.3, p=0.15                                            | BMI: r = −0.44, P= 0.03<br>HOMA-IR: r = −0.46,<br>p= 0.02                                                                                                 |                                                                                                                                                                                                                   |      |
| Health survey<br>evaluation in UK             | Case-<br>control                                        | 2017          | 22             | M             | 36±15<br>(C),<br>45±14<br>(Ob)                     | Blood | Mean ± SD<br>SELENOP, µg/mL<br>3.01 ± 0.39 (Controls)<br>vs 2.81 ± 0.30 (Ob)                                         |                                                                                                                                                           |                                                                                                                                                                                                                   | [83] |

|                                                                                                                                                                                                                                                                                                                                                                                                                            |                              |  |  |  |  |  |                                                                                                    |  |  |  |
|----------------------------------------------------------------------------------------------------------------------------------------------------------------------------------------------------------------------------------------------------------------------------------------------------------------------------------------------------------------------------------------------------------------------------|------------------------------|--|--|--|--|--|----------------------------------------------------------------------------------------------------|--|--|--|
|                                                                                                                                                                                                                                                                                                                                                                                                                            | Controls<br>n=11,<br>Ob n=11 |  |  |  |  |  | SELENOP AUC<br>20.9 (Control) vs 21.0<br>(Control+Exr) vs 19.8<br>(Ob) vs 19.5<br>(Ob+Exr), p>0.05 |  |  |  |
| MS – metabolic syndrome; Ob – obesity; NAFLD – non-alcoholic fatty liver disease; BMI – body mass index; HOMA-IR – homeostasis model assessment-insulin resistance; SELENOP – selenoprotein P; LDL – low-density lipoprotein; HDL – high-density lipoprotein; TAG – triacylglycerol; TC – total cholesterol; ALT – alanine aminotransferase; Exr – exercise; SBP – systolic blood pressure; DBP – diastolic blood pressure |                              |  |  |  |  |  |                                                                                                    |  |  |  |
