# Supplementary material for: Selenium and Selenoproteins in Adipose Tissue Physiology and Obesity
Source: MDPI journal article supplement (doi:10.3390/biom10040658), 2020-04-24
Supplement: s1 [file s1]

**Table S1.** A summary of studies investigating the association between blood selenium levels in relation to increased BMI or obesity.

| Population                                  | Study design                    | Year      | N (M/F)            | Sex        | Age, y                              | Specimen      | Se levels                                                                                                                                                                                              | Statistics                                                                                                                                                          | Adjustments factors                                                                                                                                                                                                                                                                                                              | Ref. |
|---------------------------------------------|---------------------------------|-----------|--------------------|------------|-------------------------------------|---------------|--------------------------------------------------------------------------------------------------------------------------------------------------------------------------------------------------------|---------------------------------------------------------------------------------------------------------------------------------------------------------------------|----------------------------------------------------------------------------------------------------------------------------------------------------------------------------------------------------------------------------------------------------------------------------------------------------------------------------------|------|
| Health survey evaluation in China           | Cross-sectional                 | 2013      | 1466 (939/527)     | Both (M/F) | 22–81                               | Blood (µg/L)  | Median (25–75)<br>94 (87–103) NGg (n=1356)<br>vs 100 (90–110) HGg (n=110), p<0.001<br>97 (89–106) DLg (n=873)<br>vs 92 (84–100) NLg (n=593), p<0.001                                                   | ORs (95%CI) for Q1–Q4<br>HGg/NGg: 1.0, 1.3 (0.65–2.7), 1.7 (0.84–3.3), 2.9 (1.5–5.5), p=0.001<br>DLg/NLg: 1.0, 1.6 (1.2–2.2), 2.1 (1.5–2.8), 2.9 (2.1–4.0), p<0.001 | Adjusted for potential confounders including age, gender, body mass index, and mineral elements                                                                                                                                                                                                                                  | [39] |
| NHANES III 1988–1994                        | Cross-sectional                 | 1988–1994 | 13 289 (6440/6849) | Both (M/F) | 44.2±0.4                            | Blood (ng/mL) | Mean by quartile of %BF:<br>M 127.6 Q1(≤20.1), 127.5 Q2 (20.1–24.2), 127.4 Q3 (24.2–27.9), 126.2 Q4 (27.9–49.8)<br>F 125.4 Q1(≤29.7), 126.1 Q2 (29.7–35.4), 124.7 Q3 (35.4–40.7), 121.9 Q4 (40.7–59.4) | Difference (95%CI) by quartiles of %BF (Q4 and Q1)<br>M –1.7 (–4.2, 0.7)<br>(nonsignificant)<br>F –4.5 (–7.0, –1.9)                                                 | Adjusted for age (and race/ethnicity, education (<12 years, ≥12 years), postmenopausal status for women, smoking, serum cotinine and sedentary lifestyle, diabetes, C-reactive protein (<0.3, ≥0.3 to <1, ≥1 mg/dL), systolic blood pressure, antihypertensive medication, total cholesterol, triglycerides, and HDL-cholesterol | [30] |
|                                             |                                 |           |                    |            |                                     |               | Mean by quartile of BMI<br>M 128.8 Q1 (≤23.5), 127.2 Q2 (23.6–25.9), 127.2 Q3 (26.0–29.0), 125.6 Q4 (≥29.1)<br>F 125.6 Q1 (≤21.9), 125.6 Q2 (22.0–25.1), 124.0 Q3 (25.2–29.9), 123.2 Q4 (≥30.0)        | Difference (95%CI) by quartiles of BMI (Q4 and Q1)<br>M/F –4.0 (–5.5, –1.6)                                                                                         |                                                                                                                                                                                                                                                                                                                                  |      |
| Health survey evaluation in State of Kuwait | Case-control (Non-Ob=44, Ob=66) | 2009–2010 | 110                | F          | 30.75±9.40 (Non-Ob) - 28.5±7.0 (Ob) | Blood (µg/L)  | Mean±SD<br>101.14 ± 11.34 (Non-Ob)<br>vs 86.08 ± 14.10 (Ob)                                                                                                                                            |                                                                                                                                                                     |                                                                                                                                                                                                                                                                                                                                  | [31] |
| Health survey                               | Case-control                    | 2012      | 573                |            | 8 - 13                              | Blood (µg/L)  | Mean±SD                                                                                                                                                                                                | BMI: OR = 1.5031 (1.3828 - 1.6338)                                                                                                                                  |                                                                                                                                                                                                                                                                                                                                  | [32] |

|                                    |                                  |             |                  |            |                              |                              |                                                                                                           |                                                                                                                                                          |               |      |
|------------------------------------|----------------------------------|-------------|------------------|------------|------------------------------|------------------------------|-----------------------------------------------------------------------------------------------------------|----------------------------------------------------------------------------------------------------------------------------------------------------------|---------------|------|
| evaluation in Spain                |                                  |             |                  |            |                              |                              | 64.6 ± 16.8 (Ob) vs 75.3 ± 12.2 (Non-Ob)<br>Se intake (µg/k)<br>1.99 ± 0.62 (Ob) vs 2.73 ± 0.88 (Non-Ob)  | Se intake: OR = 0.9862 (0.9775 - 0.9949)                                                                                                                 |               |      |
| Health survey evaluation in Poland | Case-control ((Non-Ob=40, Ob=40) | 2015        | 80 (40/40)       | Both (M/F) | 6-17/13(3–18)                | Blood (µg/L)<br>Urine (µg/L) | Mean±SD<br>Blood: 111.1 ± 9.5, 102.3 ± 7.9 (Non-Ob) vs 82.8 ± 10.3, 80.4±8.2 (Ob)                         | OR=0.74 (0.62–0.88)                                                                                                                                      |               | [33] |
|                                    |                                  |             |                  |            |                              |                              | Urine: 60.3 ± 11.5, 55.9 ± 9.4 (Non-ob) vs 36.7 ± 5.6, 36.0 ± 7.5 (Ob)                                    | OR=0.60 (0.43–0.83)                                                                                                                                      |               |      |
| Health survey evaluation in UK     | Prospective                      | 2014        | 437 (78/358)     | Both (M/F) | 45.9 ± 11.2                  | Blood (µmol/L)               | Median (IQR)<br>1.02 (0.90–1.15) (preoperatively) vs 0.91 (0.82–1.14) (36 months after bariatric surgery) |                                                                                                                                                          |               | [34] |
| Health survey evaluation in France | Cross-sectional                  | 2007-2010   | 222 (56/166)     | Both (M/F) | 40.5 ± 12.6                  | Blood (µmol/L)               |                                                                                                           | Prevalence of deficiency % (n/N)<br>1.8 (1/56) for men, 3.6 (6/166) for women                                                                            | No adjustment | [35] |
| SU.VI.MAX Study 1994–1995          | Cross-sectional                  | 1994 – 1995 | 3128 (1307/1821) | Both (M/F) | 35–60/M 52.1±4.8, F 47.2±6.7 | Blood (mmol/L)               | Mean±SD (BMI)<br><br>M 1.13 ± 0.19 (<25), 1.13 ± 0.2 (25–30), 1.18 ± 0.23 (>30)                           | P (difference means)= 0.15, P trends=0.06 (BMI)<br>R <sup>2</sup> adj= 0.0232, b=0.02258<br>0.00582, SE= 0.00582, p=0.001 (Cholesterol, log-transformed) |               | [36] |
|                                    |                                  |             |                  |            |                              |                              | F 1.08±0.19 (<25), 1.11±0.19 (25–30), 1.08±0.19 (>30)                                                     | P (difference means)= 0.08, P trends=0.96 (BMI)<br>R <sup>2</sup> adj= 0.0350, b=0.01792, SE= 0.00456, p<0.001 (Cholesterol, log-transformed)            |               |      |
|                                    |                                  |             | 399              |            |                              | Blood                        | Mean±SD (BMI)                                                                                             |                                                                                                                                                          |               | [37] |

|                                             |                                                       |           |             |            |                                               |                        |                                                                                                                                                                                                                        |                                                                                                                                                                                                                     |                                                                                                 |      |
|---------------------------------------------|-------------------------------------------------------|-----------|-------------|------------|-----------------------------------------------|------------------------|------------------------------------------------------------------------------------------------------------------------------------------------------------------------------------------------------------------------|---------------------------------------------------------------------------------------------------------------------------------------------------------------------------------------------------------------------|-------------------------------------------------------------------------------------------------|------|
| ATTICA Study 2001–2002                      | Cross-sectional                                       | 2001–2002 | (236/163)   | Both (M/F) | 18–89/38.56±11.4                              | (ng/mL <sup>-1</sup> ) | M 86.7622.0 (18–24.99), 80.96±19.9 (25–29.99), 79.46±17.0 (>30), p=0.097                                                                                                                                               | b±SE<br>-0.782±0.371, p=0.036                                                                                                                                                                                       |                                                                                                 |      |
|                                             |                                                       |           |             |            |                                               |                        | F 86.4624.3 (18–24.99), 86.7623.0 (25–29.99), 79.46±17.0 (>30), p=0.736                                                                                                                                                |                                                                                                                                                                                                                     |                                                                                                 |      |
| Health survey evaluation in Northern Taiwan | Case-control (Q1 n=213, Q2 n=211, Q3 n=212, Q4 n=211) | 2007–2014 | 847         | Both (M/F) | 62.7±10.4 (Q1)–65.2±9.6 (Q4)                  | Blood (µg/L)           | Mean (interquartile cut-off values)<br>88.2±21.2 (71.4, 86.8, and 104.5)                                                                                                                                               | ORs (95%CI) for Q1–Q4<br>DM2: 1.0, 1.24 (0.78–1.98), 1.90 (1.22–2.97), 5.11 (3.27–8.00)                                                                                                                             | Adjusted for age, gender, current smoking, current drinking, and physical activity              | [40] |
|                                             |                                                       |           |             |            |                                               |                        | Mean±SD by quartile of Se level, DM2 prevalence<br>62.0±6.8 Q1 (<71.4 µg/L), DM2=22.7%<br>79.0±4.6 Q2 (71.4–86.7 µg/L), DM2=25.1%<br>95.6±5.4 Q3 (86.8–104.5 µg/L), DM2=36.3%<br>116.3±9.1 Q4 (>104.5 µg/L), DM2=59.2% | DM2: OR=1.0, 0.69 (0.37–1.27), 1.57 (0.91–2.70), 3.79 (2.17–6.32)                                                                                                                                                   | Adjusted for age, gender, current smoking, current drinking, physical activity, WC, and HOMA-IR |      |
| Health survey evaluation in Malaysia        | Case-control (DM2=82, Controls=82)                    | 2017      | 164 (78/86) | Both (M/F) | 35–55/<br>DM2 48.60±6.6, Controls 44.62(6.64) | Blood (µg/L)           | Mean (95% CI)<br>90.46 (85.97–94.94) (DM2) vs 88.17 (83.69,92.66) (Controls)                                                                                                                                           | ORs (95%CI) for T1–T3 of Se<br>BMI: 25.79 (24.14–27.45) (DM2) vs 25.87 (24.48–27.26) (Controls) (T1), 28.20 (26.42–29.98) (DM2) vs 26.16 (24.87–27.44) (Controls) (T3)<br>Body fat, %: 29.41 (27.33–31.49) (DM2) vs | Adjusted for age, gender                                                                        | [41] |

|                                   |                 |           |                  |            |                                                                    |                             |                                                                                         |                                                                                                       |                                                                                                                                                                                                            |      |
|-----------------------------------|-----------------|-----------|------------------|------------|--------------------------------------------------------------------|-----------------------------|-----------------------------------------------------------------------------------------|-------------------------------------------------------------------------------------------------------|------------------------------------------------------------------------------------------------------------------------------------------------------------------------------------------------------------|------|
|                                   |                 |           |                  |            |                                                                    |                             |                                                                                         | 31.23 (29.04–33.43) (Controls) (T1), 32.51 (30.27–34.74) (DM2) vs 31.77 (29.74–33.80) (Controls) (T3) |                                                                                                                                                                                                            |      |
| Health survey evaluation in Japan | Follow-up       | 2008-2012 | 76 (42/34)       | Both (M/F) | 51.9 ± 10.5                                                        | Blood                       | Mean±SD<br>Serum Se (µg/L)<br>157.9 ± 21.7 (Baseline) vs 205.0 ± 22.1 (4 year), p=0.075 | r=0.329, p=0.029 (WC)<br>r=0.187, p=0.225 (BMI)                                                       |                                                                                                                                                                                                            | [42] |
|                                   |                 |           |                  |            |                                                                    |                             | SELENOP (µg/mL)<br>2.51 ± 0.52 (Baseline) vs 3.81 ± 0.60 (4 year), p<0.001              | r=-0.023, p=0.844 (WC)<br>r=-0.042, p=0.721 (BMI)                                                     |                                                                                                                                                                                                            |      |
|                                   |                 |           |                  |            |                                                                    |                             | GPX3 activity (U/L)<br>190.4 ± 68.5 (Baseline) vs 238.3 ± 55.2 (4 year), p<0.001        |                                                                                                       |                                                                                                                                                                                                            |      |
| IMMIDIET study                    | Cross-sectional | 2012      | 1 902 (942/ 960) | Both (M/F) | M Non MS 46.2±7.9 vs MS 49.1±7.5, F Non MS 43.9±7.8 vs MS 49.4±7.2 | Blood (mmol <sup>-1</sup> ) | Mean (SD)<br>M 1.24 (0.23) (Non MS) vs 1.24 (0.23) (MS), p=0.84                         | OR (95%CI)<br>M OR=0.97 (0.81-1.16), p=0.75                                                           | Adjusted for age, country group, social status, physical activity, energy intake, alcohol consumption and smoking.                                                                                         | [43] |
|                                   |                 |           |                  |            |                                                                    |                             | F 1.21 (0.23) (Non MS) vs 1.32 (0.28) (MS), p=0.0002                                    | F OR=1.42 (1.15-1.77), p=0.001                                                                        |                                                                                                                                                                                                            |      |
|                                   |                 |           |                  |            |                                                                    |                             |                                                                                         | F OR=1.33 (1.06-1.67), p=0.01                                                                         | Adjusted for age, country group, social status, physical activity, energy intake, alcohol consumption and smoking, for menopausal status, uses of oral contraceptive pills or hormonal replacement therapy |      |

|                                              |                                                             |           |                |            |                                                                 |              |                                                                                                                                                                              |                                                                                                                                                                                       |                                                                                           |      |
|----------------------------------------------|-------------------------------------------------------------|-----------|----------------|------------|-----------------------------------------------------------------|--------------|------------------------------------------------------------------------------------------------------------------------------------------------------------------------------|---------------------------------------------------------------------------------------------------------------------------------------------------------------------------------------|-------------------------------------------------------------------------------------------|------|
| Health survey evaluation in Taiwan 2007-2017 | Case-control Q1 n=292, Q2 n=290, Q3 n=292, Q4 n=291         | 2007-2017 | 1165 (418/747) | Both (M/F) | 65.8 ± 10.3 Q1, 65.9 ± 9.7 Q2, 66.7 ± 9.6 Q3, 64.9 ± 10.3 Q4    | Blood (µg/L) | Mean ± SD by quartile of Se level<br>65.13 ± 7.81 Q1 (≤76.0 µg/L),<br>85.16 ± 5.19 Q2 (76.1–94.0 µg/L),<br>104.46 ± 5.59 Q3 (94.1–113.7 µg/L),<br>130.66 ± 14.82 Q4 (>113.7) | ORs (95%CI) for Q1-Q4 (MS)<br>M OR=1.0, 1.62 (0.79–3.31), 1.94 (0.99–3.82), 5.33 (2.94–9.66), p<0.001<br><br>F OR=1.0, 1.03 (0.64–1.65), 2.10 (1.25–3.52), 2.38 (1.18–4.83), p=0.015  | Adjusted for age, current smoking status, current drinking status, physical activity, BMI | [44] |
| Health survey evaluation in Indonesia        | Case-control Ob n = 26, (Ob + 1 component n = 28, MS n = 24 | 2013      | 78             | M          | 39.7 ± 7.7 (Ob), 38.4 ± 5.6 (Ob + 1 component), 36.4 ± 5.8 (MS) | Blood        | Mean ± SD (Range)<br>Serum Se, ng/mL<br>95.8 ± 20.2 (62.0–163.0) (Ob)<br>102.2 ± 20.7 (63.0–162.0) (Ob + 1 component)<br>105.6 ± 22.0 (54.0–143.0) (MS)                      | HDL: r=0.390, p<0.05 (Ob), r=0.105, p>0.05 (Ob + 1 component), r=0.013, p>0.05 (MS)<br>FABP4: r=0.474, p<0.05 (Ob), r=0.023, p>0.05 (Ob + 1 component), r=-0.083, p>0.05 (MS)         |                                                                                           | [45] |
|                                              |                                                             |           |                |            |                                                                 |              | GPX activity (Δmmol NADPH mL <sup>-1</sup> min <sup>-1</sup> )<br>166 ± 21 (116–215) (Ob)<br>163 ± 26 (110–225) (Ob + 1 component)<br>172 ± 20 (140–210) (MS)                | HDL: r=0.075, p>0.05 (Ob)<br>r= 0.413, p<0.05 (Ob + 1 component)<br>r=0.189, p>0.05 (MS)<br>FABP4: r=-0.467, p<0.05 (Ob), r=-0.190, p>0.05 (Ob + 1 component), r= -0.077, p>0.05 (MS) |                                                                                           |      |
| Health survey evaluation in Brazil           | Trial Ob n = 29, Control n = 26                             | 2015      | 55             | F          | 18-55                                                           | Blood        | T0 (Baseline)–T1(after 2 mo)<br>Plasma Se (mg/L)<br>87.1 (82-97.7) – 244 (226-278) (Ob) vs 65.7 (61.7-71.3) – 63.2 (60.6-67.7) (Control)                                     | r=0.579 p<0.001 (TNFα)<br>r=0.625, p<0.001 (IL-6)<br>r=0.567, p<0.001 (IL-10)<br>r=0.662, p<0.001 (TLR2)<br>r=0.753, p<0.001 (TLR4)                                                   |                                                                                           | [48] |
|                                              |                                                             |           |                |            |                                                                 |              | RBC Se (mg/L) 125 (122-143) – 351 (309-480) (Ob)                                                                                                                             | r=0.564, p<0.001 (TNFα)<br>r=0.647, p<0.001 (IL-6)<br>r=0.437, p=0.001 (IL-10)                                                                                                        |                                                                                           |      |

|  |  |  |  |  |  |  |                                                                                                                         |                                                                                                                                      |  |  |
|--|--|--|--|--|--|--|-------------------------------------------------------------------------------------------------------------------------|--------------------------------------------------------------------------------------------------------------------------------------|--|--|
|  |  |  |  |  |  |  | vs 125 (120-141) – 130.2<br>(116-146) (Control)                                                                         | r=0.561, p<0.001 (TLR2)<br>r=0.698, p<0.001 (TLR4)                                                                                   |  |  |
|  |  |  |  |  |  |  | SELENOP (ng/mL) 37.7<br>(16.1-51.9) – 55.5 (37.1-<br>150.6) (Ob) vs 28.5 (12.5-<br>52.1) – 23.6 (16-32.6)<br>(Control)  | r=0.433, p=0.003 (TNFα)<br>r=0.636, p<0.001 (IL-6)<br>r=0.369, p=0.008 (IL-10)<br>r=0.321, p=0.037 (TLR2)<br>r=0.421, p=0.004 (TLR4) |  |  |
|  |  |  |  |  |  |  | GPX1 activity (U/gHb)<br>48.7 (37.5-57.6) – 57.2 (45.8-<br>67.5) (Ob) vs 47.2 (41-57.1)<br>– 49.7 (43.5-58.5) (Control) |                                                                                                                                      |  |  |

MS – metabolic syndrome; BMI – body mass index; BF – body fat; NGg – normal glucose group; NLg – normal lipid group; DLg – dyslipidemia group; HGg – hyperglycemia group; Ob – obesity; DM2 – diabetes mellitus type 2; GPX – glutathione peroxidase; SELENOP – selenoprotein P; RBC – red blood cells; FABP4 – fatty acid binding protein 4; TNFα – tumor necrosis factor α; IL – interleukin; TLR – Toll-like receptor; WC – waist circumference; HOMA-IR – homeostasis model assessment-insulin resistance
