# Supplementary material for: Selenium and Selenoproteins in Adipose Tissue Physiology and Obesity
Source: MDPI journal article supplement (doi:10.3390/biom10040658), 2020-04-24
Supplement: s1 [file s1]

**Table S2.** A review of studies demonstrating the relationship between BMI and obesity with blood GPX activity

| Population                          | Study design                          | Year | N (M/F)          | Sex           | Age   | Specimen | Se levels                                                                                                                                                                                                                               | Statistics                                                                                                                                                                              | Adjustments factors | Ref . |
|-------------------------------------|---------------------------------------|------|------------------|---------------|-------|----------|-----------------------------------------------------------------------------------------------------------------------------------------------------------------------------------------------------------------------------------------|-----------------------------------------------------------------------------------------------------------------------------------------------------------------------------------------|---------------------|-------|
| Health survey evaluation in Algeria | Case-control<br>Young n=110, old n=95 | 2011 | 205              | M             | 20-75 | Blood    | GPX activity (U/ g Hb)                                                                                                                                                                                                                  | BMI: $r=-0.177$ , $p>0.05$ (Young) vs $r=-0.252$ , $p>0.05$ (Old)<br>$R^2=0.15$ , $b$ (SE) $=-0.232$ (0.08), $p=0.04$<br>BMI and age: $R^2=0.28$ , $b$ (SE) $=-0.475$ (0.05), $p=0.001$ |                     | [49]  |
|                                     |                                       |      |                  |               |       |          | SOD activity                                                                                                                                                                                                                            | BMI: $r=0.431$ , $p<0.001$ (Young) vs $r=-0.522$ , $p<0.001$ (Old)<br>$R^2=0.22$ , $b$ (SE) $=0.411$ (0.05), $p=0.001$<br>BMI and age: $R^2=0.75$ , $b$ (SE) $=0.751$ (0.04), $p<0.001$ |                     |       |
|                                     |                                       |      |                  |               |       |          | Catalase activity                                                                                                                                                                                                                       | BMI: $r=0.227$ , $p>0.05$ (Young) vs $r=-0.263$ , $p>0.05$ (Old)<br>$R^2=0.21$ , $b$ (SE) $=0.248$ (0.07), $p=0.04$<br>BMI and age: $R^2=0.34$ , $b$ (SE) $=0.583$ (0.06), $p=0.001$    |                     |       |
| Health survey evaluation in Kuwait  | Case-control<br>Control n=50, Ob=250  | 2002 | 300<br>(120/180) | Both<br>(M/F) | 20-75 | Blood    | GPX activity (units/g Hb)<br>Mean $\pm$ SD by quartile of BMI<br>98.4 $\pm$ 3.3 Q1 (19 – 25), 95.1 $\pm$ 3.6 Q2(30 – 34), 90.0 $\pm$ 7.4 Q3 (35 – 39), 84.3 $\pm$ 6.7 Q4 (40 – 44), 80.8 $\pm$ 7.2 Q5 (45 – 49), 76.3 $\pm$ 6.9 Q6(>50) | BMI: $r=-0.436$ , $p=0.018$                                                                                                                                                             |                     | [50]  |

|                                         |                                                                                |           |                 |               |                                     |       |                                                                                                                                                                                                            |                                                                  |                                                                                                                                                                              |      |
|-----------------------------------------|--------------------------------------------------------------------------------|-----------|-----------------|---------------|-------------------------------------|-------|------------------------------------------------------------------------------------------------------------------------------------------------------------------------------------------------------------|------------------------------------------------------------------|------------------------------------------------------------------------------------------------------------------------------------------------------------------------------|------|
| Health survey evaluation in Iran        | Case-control<br>Control n = 79,<br>Overweight n = 56, Ob n = 25                | 2014      | 160             | F             | 20-45/27± 9<br>vs 35± 8<br>vs 39± 6 | Blood | GPX activity (U/gHb)<br>Mean ± SD<br>148.7 ± 54.2 (Controls)<br>vs 124.6 ± 48.9<br>(Overweight) vs 97.6 ± 45.2 (Ob), p=0.005<br>154.7 ± 62.4 (normal)<br>vs 103.6 ± 52.8<br>(abdominal obesity),<br>p<0.01 | BMI: r=-0.275, p<0.01<br>R <sup>2</sup> =7.2%, b=-0.312, p=0.002 | Adjusted for age, physical activity, number of pregnancies, systolic and diastolic blood pressures and nutrient intakes (energy, protein, total fat and carbohydrate intake) | [51] |
| Health survey evaluation in UK          | Case-control<br>Ob n=82,<br>Non-Ob n=155, MS n=161, Non-MS n=76, Control n=135 | 2008      | 237<br>(142/95) | Both<br>(M/F) | 55.1±13.3                           | Blood | Mean ± SD<br>Serum Se (μmol/L)<br>1.04±0.24 (Ob)<br>vs 1.10±0.23 (Non-Ob);<br>1.08±0.23 (MS)<br>vs 1.08±0.23 (Non-MS); 1.03±0.03<br>(Control)                                                              |                                                                  |                                                                                                                                                                              | [52] |
|                                         |                                                                                |           |                 |               |                                     |       | GPX activity (U/mL)<br>0.28±0.09 (Ob)<br>vs 0.33±0.10 (Non-Ob); 0.31±0.11 (MS)<br>vs 0.31±0.08 (Non-MS); 0.36±0.12<br>(Control)                                                                            |                                                                  |                                                                                                                                                                              |      |
| Health survey evaluation in South Korea | Case-control<br>WHR ≤ 0.90 n=11,<br>0.90 < WHR ≤ 0.95 n=32,<br>WHR > 0.95 n=30 | 2008-2010 | 73              | M             | 45.1 ± 7.2 -<br>46.6 ± 8.           | Blood | Mean ± SD<br>GPX activity (nmol/min/mL)<br>Mean ± SD by WHR<br>107.5 ± 37.7 (25.4 ± 3.4)<br>vs 123.4 ± 38.0<br>(26.5 ± 2.7) vs                                                                             | r=0.318, p<0.01 (WHR)                                            |                                                                                                                                                                              | [53] |

|                 |                     |               |                   |               |                      |       |                                                                                                                                                                                           |                                                                                                                                           |                                                                                                                                                                                                                                                                                                                                                                                                                                                                             |      |
|-----------------|---------------------|---------------|-------------------|---------------|----------------------|-------|-------------------------------------------------------------------------------------------------------------------------------------------------------------------------------------------|-------------------------------------------------------------------------------------------------------------------------------------------|-----------------------------------------------------------------------------------------------------------------------------------------------------------------------------------------------------------------------------------------------------------------------------------------------------------------------------------------------------------------------------------------------------------------------------------------------------------------------------|------|
|                 |                     |               |                   |               |                      |       | 135.4 ± 35.6 (26.9 ± 2.8),<br>p=0.095                                                                                                                                                     |                                                                                                                                           |                                                                                                                                                                                                                                                                                                                                                                                                                                                                             |      |
| British<br>NDNS | Cross-<br>sectional | 2000–<br>2001 | 1050<br>(512/538) | Both<br>(M/F) | 41.0 (31.0,<br>53.0) | Blood | Median (Q1-Q3) by<br>BMI<br>GPX activity (nmol mg<br>Hb <sup>-1</sup> min <sup>-1</sup> )<br>121.3 (106.0, 145.0)<br>(<25), 121.0 (103.0,<br>144.0) (25-29), 115.7<br>(98.4, 135.0) (>30) | Difference (95% CI) by WHR<br>(Q4-Q1)<br>-7.4 (-12.7, -2.0), p<0.05                                                                       | Adjusted for age                                                                                                                                                                                                                                                                                                                                                                                                                                                            | [54] |
|                 |                     |               |                   |               |                      |       | Plasma Se (mmol/L) by<br>BMI<br>1.09 (0.99, 1.22) (<25),<br>1.07 (0.97, 1.18) (25-<br>29), 1.08 (0.99, 1.21)<br>(>30)                                                                     | Difference (95% CI) by BMI<br>(Q3-Q1)<br>-7.9 (-13.2, -2.7), p<0.05<br>Difference (95% CI) by WC<br>(Q4-Q1)<br>-9.7 (-16.2, -3.2), p<0.05 | Adjusted for sex,<br>menopausal status,<br>household income<br>group, educational<br>level group,<br>employment, daily<br>food energy, total<br>fat intake, total<br>cholesterol intake,<br>polyunsaturated-<br>to-saturated fatty<br>acids ratio,<br>carbohydrate<br>intake, starch<br>intake, nonmilk<br>extrinsic sugar<br>intake, protein<br>intake, sodium<br>intake, smoking<br>status, daily<br>cigarette<br>consumption,<br>current drinking<br>status, daily units |      |
|                 |                     |               |                   |               |                      |       | RBC Se (mmol/L) by<br>BMI<br>1.63 (1.34, 1.95)<br>(<25) 1.61 (1.40, 1.86),<br>(25-29), 1.62 (1.37, 1.89)<br>(>30)                                                                         | Difference (95% CI) by WC<br>(Q4-Q1)<br>-0.06 (-0.12, 0.01), p>0.05<br>Difference (95% CI) by WHR<br>(Q4-Q1)<br>0.10 (0.00, 0.20), p<0.05 |                                                                                                                                                                                                                                                                                                                                                                                                                                                                             |      |

|                                       |                                                            |      |     |            |                                                              |       |                                                                                                                |                                                                  |                                                                                                                                                                                           |      |
|---------------------------------------|------------------------------------------------------------|------|-----|------------|--------------------------------------------------------------|-------|----------------------------------------------------------------------------------------------------------------|------------------------------------------------------------------|-------------------------------------------------------------------------------------------------------------------------------------------------------------------------------------------|------|
|                                       |                                                            |      |     |            |                                                              |       |                                                                                                                |                                                                  | of alcohol, daily physical activity score, vitamin/mineral supplement use, oral contraceptive use, hormone replacement therapy, TC, non-HDL-cholesterol, and TC-to-HDL-cholesterol ratio. |      |
|                                       |                                                            |      |     |            |                                                              |       |                                                                                                                | Difference (95% CI) by BMI (Q3-Q1)<br>-7.9 (-13.2, -2.7), p<0.05 | Adjusted for age                                                                                                                                                                          |      |
| Health survey evaluation in Brazil    | Case-control<br>Control n=36,<br>Ob=37                     | 2011 | 73  | F          | 20-50/<br>31.2±7.8 (C), 33.7±7.9 (Ob)                        | Blood | Mean ± SD<br>GPX activity (U/gHb min)                                                                          | 46.4±19.4 (Obese) vs 36.7±13.6 (Controls), p<0.05                | b=0.51, t=3.06, p=0.05 (TAG)                                                                                                                                                              | [55] |
| Health survey evaluation in Sri Lanka | Case-control<br>DM2 n=147,<br>PreDM2 n=47,<br>Controls=106 | 2019 | 147 | Both (M/F) | DM2 47.6 ± 8.3,<br>PreDM2 45.7 ± 8.8,<br>Controls 44.2 ± 8.2 | Blood | Mean ± SD<br>GPX activity (Ug/Hb per min)<br>342 ± 287 (DM2+Ob) vs 300 ± 219 (DM2-Ob), 267 ± 147 (Controls+Ob) | BMI: r=0.23, p=0.044<br>WHR: r=0.20, p=0.043                     |                                                                                                                                                                                           | [56] |
|                                       |                                                            |      |     |            |                                                              |       | 350 ± 291 (DM2+COB) vs 300 ± 191 (DM2-COB), 292 ± 243 (PreDM2+COB) vs 271 ± 171 (PreDM2-COB), 272 ± 172        | BMI: r=0.24, p=0.047<br>WHR: r=0.40, p=0.021                     |                                                                                                                                                                                           |      |

|                                    |                                                            |           |             |            |                                          |       |                                                                                                                                                      |                                                                                       |  |      |
|------------------------------------|------------------------------------------------------------|-----------|-------------|------------|------------------------------------------|-------|------------------------------------------------------------------------------------------------------------------------------------------------------|---------------------------------------------------------------------------------------|--|------|
|                                    |                                                            |           |             |            |                                          |       | (Controls+COB), 227 ± 152 (Controls-COB)                                                                                                             |                                                                                       |  |      |
| Health survey evaluation in Mexico | Case-control<br>Control n=28, Ob n=133                     | 2012      | 161         | Both (M/F) | 31.7±12.4 (C), 42.8±10.7 (Ob)            | Blood | Mean ± SD<br>GPX activity (ng/dL)<br>143.5 ± 23.1 (Controls) vs 175.4 ± 26.1 (Overweight) vs 175.2 ± 24.3 (Ob)                                       | Weight: r=0.199, p<0.01<br>TAG/HDL: r=0.228, p<0.01<br>QUICKI index: r=-0.234, p<0.01 |  | [57] |
| Health survey evaluation in Spain  | Case-control<br>HOMA-IR <median n=31, HOMA-IR >median n=29 | 2009      | 60 (17/43)  | Both (M/F) | 42.2 ± 10.7 – 44.9 ± 8.6                 | Blood | Mean ± SD<br>GPX activity (nmol/min/mL)<br>19.5 ± 4.6 (HOMA-IR <median) vs 23.5 ± 6.5 (HOMA-IR ≥median)                                              | ΔTAG: r=0.37, p=0.006                                                                 |  | [58] |
| Health survey evaluation in Turkey | Cross-sectional                                            | 2007      | 120 (50/70) | Both (M/F) | 8.80 ± 1.26 (Ob), 8.96 ± 1.05 (Controls) | Blood | Mean ± SD<br>GPX activity (U/g Hb)<br>19.16 ± 2.22 (Ob) vs 23.68 ± 3.58 (Controls), p<0.001                                                          | Adjusted for gender or age, height and BMI                                            |  | [59] |
| Health survey evaluation in China  | Case-control<br>Controls n=30, Ob n=31                     | 2012-2013 | 61          | M          | 41-47/44.03±1.87                         | Blood | Mean ± SD<br>GPX activity (U/ml)<br>860.11±24.81 (Ob) vs 877.40±24.32 (Controls), p<0.01                                                             |                                                                                       |  | [60] |
| Health survey evaluation in Spain  | Cross-sectional                                            | 2010      | 68 (38/30)  | Both (M/F) | 11.6±3.1, 11.1±2.1, 10.2±2.6             | Blood | Mean ± SD by quartile of SDS-BMI<br>GPX activity (U*gHb <sup>-1</sup> )<br>89.32 ± 39.94 (<1.33), 139.85 ± 32.48 (2-3), 137.32 ± 78.98 (>3), p=0.002 | TC: r=-0.34, p=0.019<br>MDA: r=0.43, p=0.002<br>Vit E: r=-0.32, p=0.028               |  | [61] |
| Health survey                      | Case-control                                               | 2012      | 106 (50/56) | Both (M/F) | 6–12                                     | Blood | Mean ± SD<br>GPX activity (U/g Hb)                                                                                                                   | BMI: r=0.17, p=0.28<br>WC: r=-0.05, p=0.86                                            |  | [62] |

|                                                      |                                                                 |               |                 |               |                                                                                         |       |                                                                                                                                                                                                                                                              |  |  |      |
|------------------------------------------------------|-----------------------------------------------------------------|---------------|-----------------|---------------|-----------------------------------------------------------------------------------------|-------|--------------------------------------------------------------------------------------------------------------------------------------------------------------------------------------------------------------------------------------------------------------|--|--|------|
| evaluation<br>in Tunisia                             | Control n=52,<br>Ob n=54                                        |               |                 |               |                                                                                         |       | M 6-8.5 years:<br>39.77 ± 6.98 (Ob) vs<br>32.48 ± 7.29 (Controls),<br>9-12 years: 34.38 ± 8.52<br>(Ob) vs 33.83 ± 8.9<br>(Controls)                                                                                                                          |  |  |      |
|                                                      |                                                                 |               |                 |               |                                                                                         |       | F 6-8.5 years:<br>38.83 ± 7.26 (Ob) vs<br>34.41 ± 6.22 (Controls),<br>9-12 years: 36.55 ± 6.48<br>(Ob) vs 35.64 ± 8.31<br>(Controls)                                                                                                                         |  |  |      |
| Health<br>survey<br>evaluation<br>in Saudi<br>Arabia | Case-control<br>Control n=66,<br>Overweight<br>n=83, Ob<br>n=64 | 2011-<br>2012 | 213<br>(143/70) | Both<br>(M/F) | 6-12/9.5 ±<br>1.5                                                                       | Blood | Mean ± SD<br>GPX activity (mg/g<br>Hb)<br>37.3 ± 5.9 (Ob) vs<br>56.8 ± 3.5 (Overweight)<br>vs 41.4 ± 2.6 (Controls),<br>p=0.001                                                                                                                              |  |  | [63] |
| Health<br>survey<br>evaluation<br>in Turkey          | Case-control<br>Ob-IR n=20,<br>Ob+IR<br>n=22, Control<br>s n=21 | 2012          | 63              | Both<br>(M/F) | 10.27 ± 2.36<br>(Ob-<br>IR), 11.26 ±<br>2.52<br>(Ob+IR), 11.<br>41 ± 2.00<br>(Controls) | Blood | Mean ± SD<br>GPX activity (U/mL)<br>0.026 ± 0.011 (Ob+IR)<br>vs 0.046 ± 0.015 (Ob-<br>IR) vs 0.048 ± 0.012<br>(Controls), p=0.001<br>(Adolescents)<br>0.032 ± 0.01 (Ob+IR)<br>vs 0.042 ± 0.01 (Ob-IR)<br>vs 0.048 ± 0.01<br>(Controls), p=0.005<br>(Overall) |  |  | [64] |
| Health<br>survey                                     | Trial                                                           | 2006          | 66              | F             | 36.7 ± 8.3                                                                              | Blood | Mean ± SD<br>GPX activity (ng/ml)                                                                                                                                                                                                                            |  |  | [66] |

|                                   |                                                         |      |     |             |                                    |       |                                                                                                                                                                                                                                                             |                                                     |                                                                                                         |      |
|-----------------------------------|---------------------------------------------------------|------|-----|-------------|------------------------------------|-------|-------------------------------------------------------------------------------------------------------------------------------------------------------------------------------------------------------------------------------------------------------------|-----------------------------------------------------|---------------------------------------------------------------------------------------------------------|------|
| evaluation in Greece              |                                                         |      |     |             |                                    |       | 67.5 ± 21.3 (Controls) vs 22.3 ± 9.5 (Ob before) vs 48.9 ± 14.1 (Ob after), p<0.001                                                                                                                                                                         |                                                     |                                                                                                         |      |
| Health survey evaluation in India | Case-control<br>Controls n=20, Ob n=20, Non-Ob+DM2 n=20 | 2011 | 60  | Unkn<br>own | 45–65                              | Blood | Mean ± SD<br>GPX activity (U/mg proteins)<br>70.9 ± 9.6 (Controls) vs 23.4 ± 3.8 (Ob+DM2 PreIns) vs 26.05 ± 4.03 (Ob+DM2 24w) vs 28.4 ± 6.4 (Ob+DM2 48w);<br>41.5 ± 3.5 (Non-Ob+DM2 Pre-Insulin) vs 48.7 ± 4.8 (Non-Ob+DM2 24w) 51.8 ± 5.4 (Non-Ob+DM2 48w) |                                                     |                                                                                                         | [67] |
| Health survey evaluation in China | Trial<br>Placebo n=45, His n=47                         | 2013 | 92  | F           | 33–51                              | Blood | Mean ± SD<br>GPX activity (nmol/ml)<br>135.3 ± 29.0 (Baseline), 138.1 ± 26.2 (12w) (Controls) vs 136.6 ± 25.4 (baseline), 150.3 ± 28.3 (12w) (Ob)                                                                                                           | 13.71 [95% CI 9.65, 17.78]<br>His: r=0.324, p=0.009 |                                                                                                         | [69] |
| Health survey evaluation in China | Case-control<br>Controls n=217, Ob n=235                | 2012 | 452 | F           | 43.39±2.57 (C),<br>44.13±1.73 (Ob) | Blood | Mean ± SD<br>GPX activity (μmol/L)<br>158.90 ± 36.43 (Ob) vs 167.39 ± 33.01 (Controls), p<0.001                                                                                                                                                             | His: b=0.149, p<0.005                               | Adjusted for age, smoking, alcohol use, menopause and physical activity at work and at leisure, and BMI | [70] |

|                                    |                                          |      |                 |               |                                                            |       |                                                                                                                                                                                                           |                                                                                                                                                                                                                  |                                                                |      |
|------------------------------------|------------------------------------------|------|-----------------|---------------|------------------------------------------------------------|-------|-----------------------------------------------------------------------------------------------------------------------------------------------------------------------------------------------------------|------------------------------------------------------------------------------------------------------------------------------------------------------------------------------------------------------------------|----------------------------------------------------------------|------|
| Health survey evaluation in Spain  | Case-control<br>Controls n=191, Ob n=193 | 2014 | 193<br>(104/89) | Both<br>(M/F) | 3-13/ 8.9±0.1 (C), 8.7±0.1 (Ob)                            | Blood | Mean ± SD<br>GPX activity (mol/g Hb/min)<br>0.019 ± 0.001 (Ob) vs 0.018 ± 0.001 (Controls), p=575                                                                                                         | OR (95% CI)<br>GPX4 SNP rs757228: 0.729 (0.533-0.997), p=0.048<br>GPX4 SNP rs8103188: 0.696 (0.506-0.957), p=0.026<br>GPX5 rs445870: 1.452 (1.043-2.020), p=0.027<br>GPX6 rs406113: 1.562 (1.117-2.184), p=0.009 | Adjusted by sex and age under an additive model of inheritance | [73] |
| Health survey evaluation in Brazil | Trial                                    | 2011 | 37              | F             | 32.4±6.5 (Pro/Pro), 36.1±7.0 (Pro/Leu), 36.8±6.8 (Leu/Leu) | Blood | Mean ± SD<br><b>Plasma Se (µg/L)</b><br>54.0 ± 12.1 (Pro/Pro), 55.2 ± 14.0 (Pro/Leu), 62.7 ± 16.0 (Leu/Leu) (Baseline) vs 126.6 ± 21 (Pro/Pro), 134.4 ± 40.4 (Pro/Leu), 148.3 ± 45.0 (8w supplementation) |                                                                                                                                                                                                                  |                                                                | [74] |
|                                    |                                          |      |                 |               |                                                            |       | RBC Se (µg/L)<br>60.8 ± 18.5 (Pro/Pro), 65.0 ± 37.6 (Pro/Leu), 59.7 ± 23.1 (Leu/Leu) (Baseline) vs 200.8 ± 33.1 (Pro/Pro), 207.3 ± 39.5 (Pro/Leu), 220.2 ± 76.0 (8w supplementation)                      | GPX activity/RBC Se (Baseline)<br>r=0.60, p< 0.01 (Pro/Pro)<br>r=0.44, p=0.117 (Pro/Leu)<br>r=0.62, p=0.261 (Leu/Leu)                                                                                            |                                                                |      |
|                                    |                                          |      |                 |               |                                                            |       | GPX activity (U/g Hb)<br>38.5 ± 18.0 (Pro/Pro), 33.0 ± 12.4 (Pro/Leu), 31.4 ± 19.6 (Leu/Leu) (Baseline) vs 57.4 ± 21.5 (Pro/Pro), 51.7 ± 19.7                                                             | GPX activity/RBC Se (8w supplementation)<br>r=0.43, p< 0.05 (Pro/Pro)<br>r=-0.21, p=0.475 (Pro/Leu)<br>r=-0.53, p=0.358 (Leu/Leu)                                                                                |                                                                |      |



|                                                                                                                                                                                                                                                                                                                                                                                                                                                                                                                                                                                                    |  |  |  |  |  |  |                                                |  |  |  |
|----------------------------------------------------------------------------------------------------------------------------------------------------------------------------------------------------------------------------------------------------------------------------------------------------------------------------------------------------------------------------------------------------------------------------------------------------------------------------------------------------------------------------------------------------------------------------------------------------|--|--|--|--|--|--|------------------------------------------------|--|--|--|
|                                                                                                                                                                                                                                                                                                                                                                                                                                                                                                                                                                                                    |  |  |  |  |  |  | (Pro/Leu), 45.2 ± 19.1<br>(8w supplementation) |  |  |  |
| <p>MS – metabolic syndrome; Ob – obesity; BMI – body mass index; SDS-BMI – standard deviation scores of BMI; WHR – waist-to-hip ratio; WC – waist circumference; RBC – red blood cells; SNP - single-nucleotide polymorphism; HOMA-IR – homeostasis model assessment-insulin resistance; QUICKI index – quantitative insulin-sensitivity check index; GPX – glutathione peroxidase; SOD - superoxide dismutase; Hb – hemoglobin; TAG – triacylglycerol; HDL – high-density lipoprotein; TC – total cholesterol; MDA – malondialdehyde; Pro/Pro, Pro/Leu, Leu/Leu – GPx1 Pro198Leu polymorphism</p> |  |  |  |  |  |  |                                                |  |  |  |
